# Supplementary material for: TMREC: A Database of Transcription Factor and MiRNA Regulatory Cascades in Human Diseases
Source: PLoS One. 2015 May 1;10(5):e0125222. doi: 10.1371/journal.pone.0125222 (PMC4416930; doi:10.1371/journal.pone.0125222)
Supplement: S2 Table — (XLS) [file pone.0125222.s003.xls]

## Sheet: Sheet1
Table 2: The 689 novel disease and TFs or disease and miRNAs pairs
Disease	TF/miRNA
Leukemia	miR-17
Leukemia	miR-125b
Leukemia	miR-410
Leukemia	miR-142
Leukemia	miR-31
Leukemia	miR-19b
Melanoma	miR-34b*
Lung Cancer	miR-34b*
Lymphoma	miR-34b*
Breast Cancer	miR-181c
Lymphoma	EIF2C2
Leukemia	SP1
Leukemia	miR-144
Lymphoma	FSH
Lymphoma	LIN28
Lymphoma	LIN28B
Breast Cancer	miR-19a
Breast Cancer	YBX1
Lymphoma	MYB
Lymphoma	TRIM32
Squamous Cell Carcinoma	CTNNB1
Squamous Cell Carcinoma	SPI1
Leukemia	E2F1
Leukemia	E2F3
Breast Cancer	TP63
Breast Cancer	E2F1
Breast Cancer	TGFB1
Breast Cancer	NFIX
Breast Cancer	TBP
Breast Cancer	KLF5
Breast Cancer	SFPQ
Breast Cancer	SIP1
Breast Cancer	TFAP4
Breast Cancer	AKT2
Breast Cancer	AKT3
Lymphoma	ESR1
Leukemia	SP4
Breast Cancer	STAT1
Squamous Cell Carcinoma	GATA6
Breast Cancer	CREM
Lymphoma	EGR4
Breast Cancer	ELK3
Breast Cancer	ELK4
Breast Cancer	ETS2
Breast Cancer	ETV4
Lymphoma	FANCD2
Breast Cancer	VDR
Breast Cancer	miR-371
Breast Cancer	GTF2I
Breast Cancer	HoxD10
Leukemia	MYC
Leukemia	STAT4
Lymphoma	IFNB1
Breast Cancer	KCNIP3
Squamous Cell Carcinoma	ATF3
Lymphoma	LITAF
Breast Cancer	MRF4
Breast Cancer	MYF5
Breast Cancer	MyoD
Lymphoma	NFAT5
Lymphoma	NFATC2
Lymphoma	E2F1
Lymphoma	TGFB1
Lymphoma	NR3B3
Ovaian Neoplasm	miR-371
Ovaian Neoplasm	miR-372
Ovaian Neoplasm	ZEB1
Lymphoma	SHP
Breast Cancer	SMAD3
Breast Cancer	SMAD4
Breast Cancer	FOXM1
Breast Cancer	TEAD4
Squamous Cell Carcinoma	STAT3
Squamous Cell Carcinoma	SP4
Squamous Cell Carcinoma	CDX2
Lymphoma	TXK
Lymphoma	TLR4
Squamous Cell Carcinoma	ESR1
Breast Cancer	miR-129
Squamous Cell Carcinoma	KLF5
Squamous Cell Carcinoma	SFPQ
Squamous Cell Carcinoma	SIP1
Squamous Cell Carcinoma	ZEB2
Squamous Cell Carcinoma	NFIX
Squamous Cell Carcinoma	TBP
Squamous Cell Carcinoma	BACH1
Squamous Cell Carcinoma	MEIS1
Squamous Cell Carcinoma	SMAD1
Squamous Cell Carcinoma	SMAD2
Squamous Cell Carcinoma	TRIM32
Squamous Cell Carcinoma	FOXO1
Squamous Cell Carcinoma	SP3
Breast Cancer	SP1
Squamous Cell Carcinoma	AKT2
Breast Cancer	miR-185
Leukemia	TP63
Leukemia	PTEN
Breast Cancer	miR-23b
Breast Cancer	miR-27b
Breast Cancer	miR-30
Leukemia	miR-30a
Breast Cancer	miR-30a
Melanoma	SP1
Breast Cancer	miR-34c
Breast Cancer	IFNG
Breast Cancer	HNRNPK
Breast Cancer	NFIB
Breast Cancer	PPARA
Breast Cancer	TOPORS
Breast Cancer	IGFBP1
Adenocarcinoma	FOS
Breast Cancer	TNF
Breast Cancer	MAX
Breast Cancer	miR-410
Breast Cancer	LIN28
Breast Cancer	let-7
Breast Cancer	let-7a-1
Breast Cancer	miR-23a
Breast Cancer	miR-26b
Breast Cancer	miR-29a
Breast Cancer	miR-372
Breast Cancer	ZEB1
Squamous Cell Carcinoma	AKT3
Breast Cancer	RARA
Breast Cancer	ASF
Squamous Cell Carcinoma	ASF
Breast Cancer	ATF3
Pancreatic Cancer	ATF3
Breast Cancer	BCL6
Pancreatic Cancer	BCL6
Squamous Cell Carcinoma	BCL6
Lymphoma	p27
Leukemia	NFE2L2
Lymphoma	BMP4
Pancreatic Cancer	FOS
Squamous Cell Carcinoma	MECP2
Squamous Cell Carcinoma	miR-374a
Squamous Cell Carcinoma	miR-519a
Squamous Cell Carcinoma	miR-630
Leukemia	SOX6
Leukemia	NR2C2
Leukemia	SPI1
Leukemia	STAT1
Leukemia	SP3
Breast Cancer	RELA
Squamous Cell Carcinoma	E2F1
Breast Cancer	IL6
Breast Cancer	miR-107
Breast Cancer	miR-215
Breast Cancer	miR-29
Breast Cancer	miR-519d
Squamous Cell Carcinoma	BRCA1
Breast Cancer	let-7b
Breast Cancer	let-7c
Breast Cancer	let-7e
Breast Cancer	let-7g
Breast Cancer	E2F3
Breast Cancer	FOSL2
Breast Cancer	FOXO3
Lymphoma	FOXO4
Leukemia	BCL6
Breast Cancer	GATA2
Squamous Cell Carcinoma	HIF1A
Leukemia	HIF1A
Breast Cancer	HIVEP1
Pancreatic Cancer	HIVEP1
Squamous Cell Carcinoma	HIVEP1
Breast Cancer	HMGA1
Squamous Cell Carcinoma	HMGA1
Lymphoma	PGR
Squamous Cell Carcinoma	HoxD10
Lymphoma	IFNG
Lymphoma	IL-4
Squamous Cell Carcinoma	IL-4
Lymphoma	JAG1
Pancreatic Cancer	JUN
Squamous Cell Carcinoma	JUN
Lymphoma	KLF2
Breast Cancer	MYOD1
Breast Cancer	NKX2-5
Squamous Cell Carcinoma	NKX2-5
Lymphoma	MEF2D
Lymphoma	RBL1
Lymphoma	HNRNPK
Lymphoma	IRF1
Breast Cancer	miR-199a-2
Breast Cancer	miR-214
Lymphoma	TWIST1
Breast Cancer	CEBPG
Breast Cancer	p27
Squamous Cell Carcinoma	p27
Breast Cancer	PAX2
Pancreatic Cancer	PAX2
Squamous Cell Carcinoma	PAX2
Leukemia	STAT3
Breast Cancer	PAX5
Pancreatic Cancer	PAX5
Squamous Cell Carcinoma	PAX5
Leukemia	ESR1
Leukemia	ETS1
Breast Cancer	PAX8
Pancreatic Cancer	PAX8
Squamous Cell Carcinoma	PAX8
Breast Cancer	PDGF
Squamous Cell Carcinoma	PDGF
Lymphoma	PDGF-B
Squamous Cell Carcinoma	PDGF-B
Breast Cancer	PITX1
Pancreatic Cancer	PITX1
Squamous Cell Carcinoma	PITX1
Ovaian Neoplasm	NFIX
Ovaian Neoplasm	TBP
Ovaian Neoplasm	IFNB1
Ovaian Neoplasm	MYC
Ovaian Neoplasm	miR-302f
Ovaian Neoplasm	CEBPG
Ovaian Neoplasm	E2F3
Ovaian Neoplasm	LIN28
Ovaian Neoplasm	BACH1
Ovaian Neoplasm	MEIS1
Ovaian Neoplasm	SMAD1
Ovaian Neoplasm	SMAD2
Ovaian Neoplasm	TRIM32
Ovaian Neoplasm	ZEB2
Leukemia	JAG1
Leukemia	TGFB1
Lymphoma	FOS
Breast Cancer	RUNX2
Breast Cancer	RXRA
Breast Cancer	SF2
Squamous Cell Carcinoma	SF2
Leukemia	SMAD3
Leukemia	SMAD4
Lymphoma	Src
Breast Cancer	miR-15a
Squamous Cell Carcinoma	STAT5
Ovaian Neoplasm	STAT6
Lymphoma	TCF3
Breast Cancer	TCF7L2
Leukemia	TEAD4
Breast Cancer	TFAP2B
Breast Cancer	TFAP2C
Breast Cancer	THRB
Lymphoma	TLR7
Lymphoma	TLR8
Lymphoma	TLX
Breast Cancer	TLX1
Leukemia	miR-18a
Squamous Cell Carcinoma	TLX1
Breast Cancer	TLX3
Squamous Cell Carcinoma	TLX3
Ovaian Neoplasm	TNFSF12
Lymphoma	SPIB
Squamous Cell Carcinoma	MYC
Lymphoma	miR-302a
Lymphoma	miR-302b
Lymphoma	miR-302c
Lymphoma	miR-302f
Lymphoma	NFKB1
Squamous Cell Carcinoma	miR-181b-2
Leukemia	USF1
Breast Cancer	YY1
Leukemia	FOXO1
Lung Cancer	E2F1
Breast Cancer	JAG1
Lung Cancer	JAG1
Breast Cancer	miR-125a-5p
Pancreatic Cancer	miR-125a-5p
Squamous Cell Carcinoma	miR-125a-5p
Lung Cancer	TGFB1
Lymphoma	miR-127-3p
Breast Cancer	miR-1285
Pancreatic Cancer	miR-1285
Squamous Cell Carcinoma	miR-1285
Squamous Cell Carcinoma	miR-20a
Lymphoma	miR-129
Squamous Cell Carcinoma	JAG1
Squamous Cell Carcinoma	miR-192
Squamous Cell Carcinoma	miR-194
Squamous Cell Carcinoma	miR-429
Squamous Cell Carcinoma	MAX
Melanoma	E2F6
Breast Cancer	miR-16
Glioma	STAT3
Ovaian Neoplasm	miR-22
Breast Cancer	miR-19b
Squamous Cell Carcinoma	ZEB1
Breast Cancer	miR-20b
Ovaian Neoplasm	miR-19a
Prostate Cancer	HNRNPK
Squamous Cell Carcinoma	miR-24
Lymphoma	miR-23b
Lymphoma	SMAD1
Lymphoma	miR-27b
Leukemia	miR-30
Lymphoma	miR-30a
Squamous Cell Carcinoma	miR-30a
Breast Cancer	miR-34b
Lymphoma	miR-34c
Gastric Cancer	RELA
Breast Cancer	miR-494
Renal Carcinoma	miR-141
Renal Carcinoma	miR-155
Breast Cancer	LTF
Breast Cancer	NR5A2
Breast Cancer	NRF1
Breast Cancer	miR-25
Breast Cancer	miR-302a
Breast Cancer	miR-302b
Breast Cancer	miR-302c
Breast Cancer	miR-302f
Breast Cancer	CBFB
Breast Cancer	MEIS1
Breast Cancer	SMAD1
Breast Cancer	SMAD2
Breast Cancer	TRIM32
Breast Cancer	ZEB2
Breast Cancer	miR-34a
Squamous Cell Carcinoma	E2F3
Leukemia	AKT1
Breast Cancer	ETS1
Lymphoma	AKT1
Breast Cancer	miR-192
Breast Cancer	miR-194
Squamous Cell Carcinoma	HNRNPK
Squamous Cell Carcinoma	NFIB
Squamous Cell Carcinoma	TOPORS
Lymphoma	AKT2
Lymphoma	AKT3
Leukemia	AP-1
Lymphoma	AP-1
Squamous Cell Carcinoma	AR
Ovaian Neoplasm	ASF
Lymphoma	ASF
Melanoma	EGR1
Melanoma	FOSL1
Ovaian Neoplasm	ATF3
Adenocarcinoma	ATF3
Lung Cancer	ATF3
Lymphoma	ATF3
Ovaian Neoplasm	BCL6
Adenocarcinoma	BCL6
Lymphoma	NR4A2
Lymphoma	MAX
Lymphoma	YBX1
Lymphoma	let-7
Lymphoma	let-7a-1
Lung Cancer	BCL6
Lymphoma	let-7f-1
Lymphoma	miR-20b
Lymphoma	miR-23a
Lymphoma	miR-29b
Lymphoma	miR-93
Lymphoma	TAL1
Lymphoma	VAV1
Lymphoma	ZNF202
Lymphoma	ZNF300
Lymphoma	miR-19b-1
Lymphoma	miR-342
Lymphoma	miR-92a-1
Leukemia	RBL1
Lymphoma	BCR
Breast Cancer	BMP4
Lung Cancer	BMP4
Breast Cancer	BMP6
Pancreatic Cancer	TP63
Pancreatic Cancer	TWIST1
Heart Disease	HES1
Heart Disease	E2F2
Heart Disease	NOTCH1
Breast Cancer	BMPR1a
Breast Cancer	BMPR1b
Leukemia	cAMP
Lymphoma	cAMP
Lymphoma	CEBPA
Squamous Cell Carcinoma	NR4A2
Squamous Cell Carcinoma	SP1
Leukemia	BACH1
Leukemia	CTNNB1
Leukemia	SMAD1
Leukemia	SMAD2
Leukemia	TRIM32
Lymphoma	CEBPB
Lymphoma	CNBP
Melanoma	CNBP
Lymphoma	CTCF
Melanoma	CTCF
Breast Cancer	DDX5
Lymphoma	DLX5
Melanoma	DLX5
Lymphoma	E2F4
Melanoma	E2F4
Lymphoma	E2F6
Lymphoma	E2F7
Melanoma	E2F7
Lung Cancer	HNRNPK
Prostate Cancer	MAX
Squamous Cell Carcinoma	HES1
Leukemia	EGR3
Leukemia	EIF2C2
Lung Cancer	EIF2C2
Lymphoma	ENO1
Melanoma	ENO1
Breast Cancer	ERK
Breast Cancer	ERS1
Lymphoma	ESR2
Squamous Cell Carcinoma	ESR2
Ovaian Neoplasm	NOTCH1
Breast Cancer	ETV5
Leukemia	EGR1
Breast Cancer	RB1
Squamous Cell Carcinoma	FOSL1
Lymphoma	FOSL1
Ovaian Neoplasm	FOXM1
Leukemia	AR
Ovaian Neoplasm	FOXO3
Breast Cancer	Foxo3a
Leukemia	FOXP3
Lymphoma	FUBP1
Melanoma	FUBP1
Lymphoma	GATA1
Melanoma	GATA1
Leukemia	NR3C1
Lymphoma	GATA2
Leukemia	HNRNPK
Leukemia	NFIB
Leukemia	TOPORS
Ovaian Neoplasm	GATA2
Melanoma	GFI1
Lymphoma	GFI1B
Melanoma	GFI1B
Melanoma	CEBPA
Ovaian Neoplasm	HIVEP1
Adenocarcinoma	HIVEP1
Lymphoma	HIVEP1
Leukemia	HIVEP1
Lymphoma	HMGA1
Melanoma	HNRNPK
Breast Cancer	HOXA5
Breast Cancer	STAT4
Lymphoma	JUN
Breast Cancer	JUNB
Breast Cancer	KLF2
Lung Cancer	KLF2
Lymphoma	KLF5
Lymphoma	LEF1
Melanoma	LEF1
Lung Cancer	LIN28
Leukemia	LIN28B
Lung Cancer	LIN28B
Lymphoma	MAZ
Melanoma	MAZ
Ovaian Neoplasm	MRF4
Ovaian Neoplasm	MYF5
Ovaian Neoplasm	MyoD
Lymphoma	NCL
Melanoma	NCL
Lymphoma	NFATC1
Melanoma	NFATC1
Leukemia	NFIC
Breast Cancer	NFIC
Lymphoma	NFIC
Leukemia	NFKB3
Lymphoma	NFKB3
Lymphoma	NME2
Melanoma	NME2
Breast Cancer	miR-135b
Lymphoma	miR-135b
Lymphoma	miR-181b-1
Ovaian Neoplasm	p27
Ovaian Neoplasm	PAX2
Adenocarcinoma	miR-146b
Adenocarcinoma	miR-20a
Adenocarcinoma	KAT2B
Lymphoma	PAX2
Leukemia	PAX2
Lung Cancer	PAX2
Ovaian Neoplasm	PAX5
Adenocarcinoma	PAX5
Leukemia	LIN28
Lung Cancer	PAX5
Leukemia	miR-148a
Ovaian Neoplasm	PAX8
Lymphoma	PAX8
Leukemia	PAX8
Lung Cancer	PAX8
Ovaian Neoplasm	PDGF
Lymphoma	PDGF
Ovaian Neoplasm	PITX1
Adenocarcinoma	PITX1
Lymphoma	PITX1
Leukemia	PITX1
Lung Cancer	PITX1
Leukemia	POU2F1
Lymphoma	POU2F1
Melanoma	POU2F2
Ovaian Neoplasm	RB1
Ovaian Neoplasm	TP73
Ovaian Neoplasm	miR-107
Ovaian Neoplasm	miR-192
Ovaian Neoplasm	miR-194
Ovaian Neoplasm	miR-215
Ovaian Neoplasm	miR-29
Ovaian Neoplasm	miR-519d
Lymphoma	HMGA2
Leukemia	PRDM1
Leukemia	PRKCA
Lymphoma	PUF60
Melanoma	PUF60
Lymphoma	PURA
Melanoma	PURA
Squamous Cell Carcinoma	RARA
Pancreatic Cancer	RARA
Breast Cancer	RAS
Breast Cancer	REL
Lymphoma	TP63
Ovaian Neoplasm	Rex1
Ovaian Neoplasm	RUNX2
Squamous Cell Carcinoma	RXRA
Pancreatic Cancer	RXRA
Ovaian Neoplasm	SF2
Lymphoma	SF2
Melanoma	SMAD1
Lymphoma	SMAD2
Melanoma	SMAD2
Lymphoma	SMAD3
Lymphoma	SMAD4
Leukemia	SMG-1
Lymphoma	SMG-1
Leukemia	SNAI1
Lymphoma	SNAI1
Squamous Cell Carcinoma	SNAI1
Uterine Leiomyoma	ZEB1
Lymphoma	SOX2
Ovaian Neoplasm	KAT2B
Lymphoma	IL1B
Lymphoma	NFIB
Lymphoma	PPARA
Lymphoma	TOPORS
Breast Cancer	TLR4
Lung Cancer	Src
Leukemia	STAT5
Leukemia	DDIT3
Gastric Cancer	STAT5A
Gastric Cancer	STAT5B
Leukemia	FOS
Breast Cancer	TCF4
Leukemia	TCF7
Lymphoma	TCF7L2
Squamous Cell Carcinoma	TFAP2B
Pancreatic Cancer	TFAP2B
Squamous Cell Carcinoma	TFAP2C
Pancreatic Cancer	TFAP2C
Endometrial Carcinoma	YBX1
Endometrial Carcinoma	let-7
Endometrial Carcinoma	let-7a-1
Endometrial Carcinoma	let-7b
Endometrial Carcinoma	let-7c
Endometrial Carcinoma	let-7e
Endometrial Carcinoma	let-7f
Endometrial Carcinoma	let-7f-1
Endometrial Carcinoma	let-7g
Endometrial Carcinoma	miR-23b
Endometrial Carcinoma	miR-26b
Endometrial Carcinoma	miR-29b
Endometrial Carcinoma	miR-29c
Lymphoma	THAP11
Melanoma	THAP11
Squamous Cell Carcinoma	THRB
Pancreatic Cancer	THRB
Lupus	PA2G4
Breast Cancer	TNFSF12
Breast Cancer	TP73
Lung Cancer	TP73
Lymphoma	RB1
Lymphoma	E2F3
Lymphoma	FOXO1
Lung Cancer	TRIM32
Squamous Cell Carcinoma	PPARA
Squamous Cell Carcinoma	RELA
Squamous Cell Carcinoma	USF1
Lymphoma	USF1
Squamous Cell Carcinoma	YBX1
Pancreatic Cancer	YBX1
Ovaian Neoplasm	YY1
Squamous Cell Carcinoma	YY1
Lymphoma	YY1
Leukemia	YY1
Lymphoma	ZBTB7A
Melanoma	ZBTB7A
Lung Cancer	SIP1
Melanoma	let-7c
Lung Cancer	SP1
Leukemia	CREB1
Ovaian Neoplasm	TLR2
Squamous Cell Carcinoma	miR-124
Hepatocellular Carcinoma	NFIC
Lung Cancer	NFIB
Lung Cancer	TOPORS
Ovaian Neoplasm	miR-125a-5p
Lymphoma	miR-125a-5p
Lung Cancer	miR-410
Leukemia	miR-125a-5p
Lung Cancer	E2F3
Lung Cancer	CTNNB1
Lung Cancer	SPI1
Lung Cancer	ZEB1
Ovaian Neoplasm	miR-1285
Adenocarcinoma	miR-1285
Lymphoma	miR-1285
Leukemia	miR-1285
Lung Cancer	miR-1285
Squamous Cell Carcinoma	ETS1
Squamous Cell Carcinoma	TFAP2A
Gastric Cancer	MYB
Leukemia	PES1
Leukemia	FOXD1
Prostate Cancer	miR-302a
Glioma	miR-302a
Prostate Cancer	miR-302b
Glioma	miR-302b
Squamous Cell Carcinoma	miR-302c
Ovaian Neoplasm	EGFR
Prostate Cancer	miR-302c
Glioma	miR-302c
Squamous Cell Carcinoma	miR-302f
Prostate Cancer	miR-302f
Glioma	miR-302f
Leukemia	CEBPG
Breast Cancer	MCPH1
Breast Cancer	PA2G4
Ovaian Neoplasm	miR-181b
Leukemia	miR-181d
Lung Cancer	AKT1
Bladder Cancer	AKT1
Gastric Cancer	AKT1
Squamous Cell Carcinoma	miR-185
Ovaian Neoplasm	miR-18a
Ovaian Neoplasm	miR-193b
Thyroid Carcinoma	IFNG
Ovaian Neoplasm	miR-19b
Melanoma	ZEB1
Ovaian Neoplasm	MCPH1
Ovaian Neoplasm	PA2G4
Endometrial Carcinoma	let-7d
Endometrial Carcinoma	miR-23a
Endometrial Carcinoma	miR-29a
Ovaian Neoplasm	miR-20b
Lung Cancer	PTEN
Prostate Cancer	E2F1
Ovaian Neoplasm	E2F1
Ovaian Neoplasm	JAG1
Prostate Cancer	JAG1
Ovaian Neoplasm	TGFB1
Prostate Cancer	TGFB1
Kidney Cancer	PTEN
Heart Disease	PTEN
Ovaian Neoplasm	SP1
Ovaian Neoplasm	miR-302a
Ovaian Neoplasm	miR-302b
Ovaian Neoplasm	TP63
Ovaian Neoplasm	CBFB
Melanoma	PRDM1
Melanoma	HMGA1
Melanoma	JAG1
Melanoma	SIP1
Lung Cancer	NFKB1
Melanoma	NFKB1
Leukemia	miR-34b*
Lung Cancer	MECP2
Melanoma	MECP2
Squamous Cell Carcinoma	miR-34b*
Lymphoma	miR-302d
Melanoma	miR-302f
Lymphoma	miR-34c-5p
Melanoma	miR-34c-5p
Lymphoma	miR-494
Renal Carcinoma	let-7d
Renal Carcinoma	miR-181b-2
Renal Carcinoma	miR-192
Renal Carcinoma	miR-194
Renal Carcinoma	miR-200a
Renal Carcinoma	miR-200b
Renal Carcinoma	miR-200c
Renal Carcinoma	miR-205
Renal Carcinoma	miR-224
Renal Carcinoma	miR-23a
Renal Carcinoma	miR-29a
Renal Carcinoma	miR-429
